# Supplementary material
Source: publisher figshare collection journal article supplement (https://gsajournals.figshare.com/ndownloader/files/38790300)
Supplement: Supplementary file 1 [file 38790300]

## Sheet: Sheet1
Table S2. Genome assembly qualities for each population and sex
Population	Sex	Scaffolds	Contigs in Scaffolds	Mean Contigs per Scaffold	Total Length	N50	L50	GC %	No. N's per 100 kbp
ChitiliLakeChL	Female	46282	84270	1.82	734406749	32814	5914	40.64	160.79
ChitiliLakeChL	Male	47835	86345	1.81	741499857	32046	6158	40.67	180.2
ChitiliRiverCh1	Female	47268	86285	1.83	736914587	32231	6095	40.67	174.24
ChitiliRiverCh1	Male	47714	82095	1.72	735690220	31909	6117	40.65	132.01
KalamboLakeKaL	Female	49070	90618	1.85	734422385	30024	6539	40.59	135.95
KalamboLakeKaL	Male	47992	94909	1.98	732052482	30744	6355	40.59	164.88
KalamboRiverKa1	Female	46494	81498	1.75	737229430	32860	6017	40.65	137.32
KalamboRiverKa1	Male	46952	83701	1.78	740164122	32430	6067	40.67	147.33
KalamboRiverKa2	Female	48912	90399	1.85	735785624	30324	6469	40.59	149.51
KalamboRiverKa2	Male	48541	88199	1.82	738325896	30621	6449	40.6	145.57
LufubuLakeLfL	Female	46346	85142	1.84	734669050	33495	5833	40.64	137.61
LufubuLakeLfL	Male	46613	84374	1.81	735535384	33001	5940	40.64	134.48
LufubuRiverLf2	Female	48402	78659	1.63	739009521	30909	6430	40.64	120.23
LufubuRiverLf2	Male	48243	77874	1.61	742156239	31165	6367	40.65	124.92
LunzuaLakeLzL	Female	47122	88376	1.88	734621853	32209	6107	40.6	151.79
LunzuaLakeLzL	Male	47983	90263	1.88	735267381	31767	6172	40.6	136.26
LunzuaRiverLz1	Female	51131	92806	1.82	732554720	28267	6955	40.59	139.9
LunzuaRiverLz1	Male	49422	93518	1.89	732648791	29587	6644	40.58	143.37
RuziziLakeRuL	Female	47758	92580	1.94	733796726	31199	6235	40.62	146.64
RuziziLakeRuL	Male	47334	94526	2	727998473	31453	6178	40.61	158.47
RuziziStreamRu1	Female	46890	96467	2.06	730333337	32226	6090	40.62	161.9
RuziziStreamRu1	Male	45710	88542	1.94	744473189	35797	5593	40.69	149.28
AstBur1.0	Female	8001	69074	8.63317	831411547	1194190	181	40.51	15932
